# Supplementary material
Source: PubMed Central journal article supplement (PMC10565610)
Supplement: jama-e2318755-s004.pdf [file jama-e2318755-s004.pdf]

## Data Sharing Statement

Atlas. A Multilevel Primary Care Intervention to Improve Follow-Up of Overdue Abnormal Cancer Screening Tests. *JAMA*. Published October 10, 2023. doi:10.1001/jama.2023.18755

### Data

**Data available:** No

### Additional Information

**Explanation for why data not available:** Requests for data or study materials can be made to the corresponding author [SJA] and will be considered based on available resources.
